# Supplementary material for: Pollination services are resilient to an extreme climatic event and mitigate crop yield declines
Source: Research Square preprint supplement (doi:10.21203/rs.3.rs-3025193/v1), 2023-07-05
Supplement: Supplementary file 1 [file b2fd5b8cd981f4ac148f76dc.docx]

**Supporting information**

**Table S1.** Results from the permutational multivariate ANOVA (Permanova) evaluating the dissimilarity of insect communities between flooded and nonflooded fields of buckwheat and oilseed mustard. Pairwise comparisons show the p-values of the Permanova, with homogeneity of multivariate dispersions in parentheses.

|  | **Buckwheat**  **flooded** | **Mustard**  **flooded** | **Buckwheat**  **non-flooded** |
| --- | --- | --- | --- |
| **Mustard** **flooded** | 0.004 (0.082) | – | – |
| **Buckwheat non-flooded** | 0.002 (0.006) | 0.001 (0.001) | – |
| **Mustard** **non-flooded** | 0.001 (0.530) | 0.231 (0.015) | 0.001 (0.012) |

**Table S2**. Results of generalised linear mixed models (GLMMs) showing the effect of field type (flooded vs. non-flooded), pollination treatment (pollinator exclusion vs. open pollination), and their interaction on buckwheat and mustard yield (measured as seed weight, g). Location was included as a random factor. Number of individual observations was 62 and 64 for buckwheat and oilseed mustard respectively.

| **Buckwheat** |  |  |  |
| --- | --- | --- | --- |
| *Fixed effects* | **χ2** | **df** | **p-value** |
| Field type | 78.00 | 1 | < 0.001 |
| Pollination treatment | 41.67 | 1 | < 0.001 |
| Field type X Pollination treatment | 1.53 | 1 | 0.22 |
| *Random effects* | **Variance** | **Std. Dev.** | **N** |
| Location | 0.106 | 0.325 | 8 |
| Residual | 0.133 | 0.365 |  |
| **Oilseed mustard** |  |  |  |
| *Fixed effects* | **χ2** | **df** | **p-value** |
| Field type | 0.16 | 1 | 0.69 |
| Pollination treatment | 111.56 | 1 | < 0.001 |
| Field type X Pollination treatment | 0.49 | 1 | 0.48 |
| *Random effects* | **Variance** | **Std. Dev.** | **N** |
| Location | 0.607 | 0.779 | 8 |
| Residual | 0.051 | 0.226 |  |

df: degrees of freedom; Std. Dev: standard deviation; N: number of locations.
